# Supplementary material for: African Natural Products for Multitarget-Based Treatment of Alzheimer’s Disease: An In Silico Study
Source: Preprints.org preprint supplement (doi:10.20944/preprints202310.0783.v1), 2023-10-12

Supplementary table 1


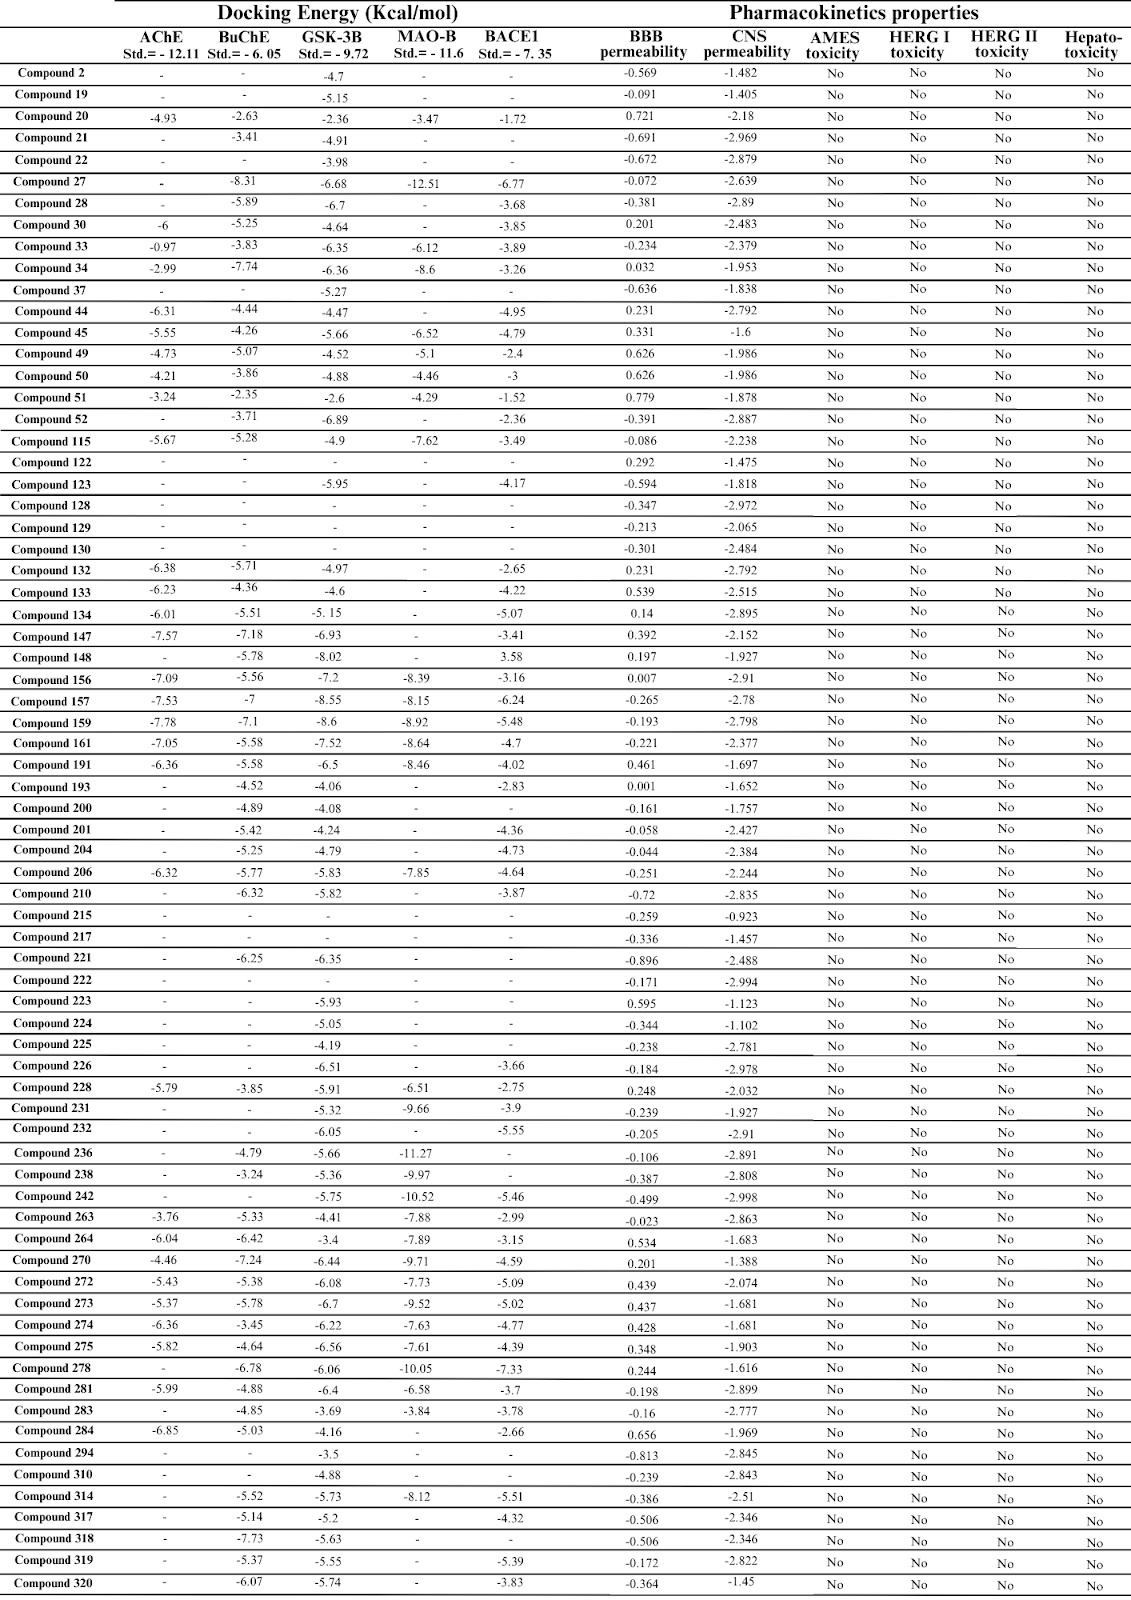
Table S1: Docking scores and pharmacokinetic properties of the 200 compounds that passed the Pharmacokinetic filters.


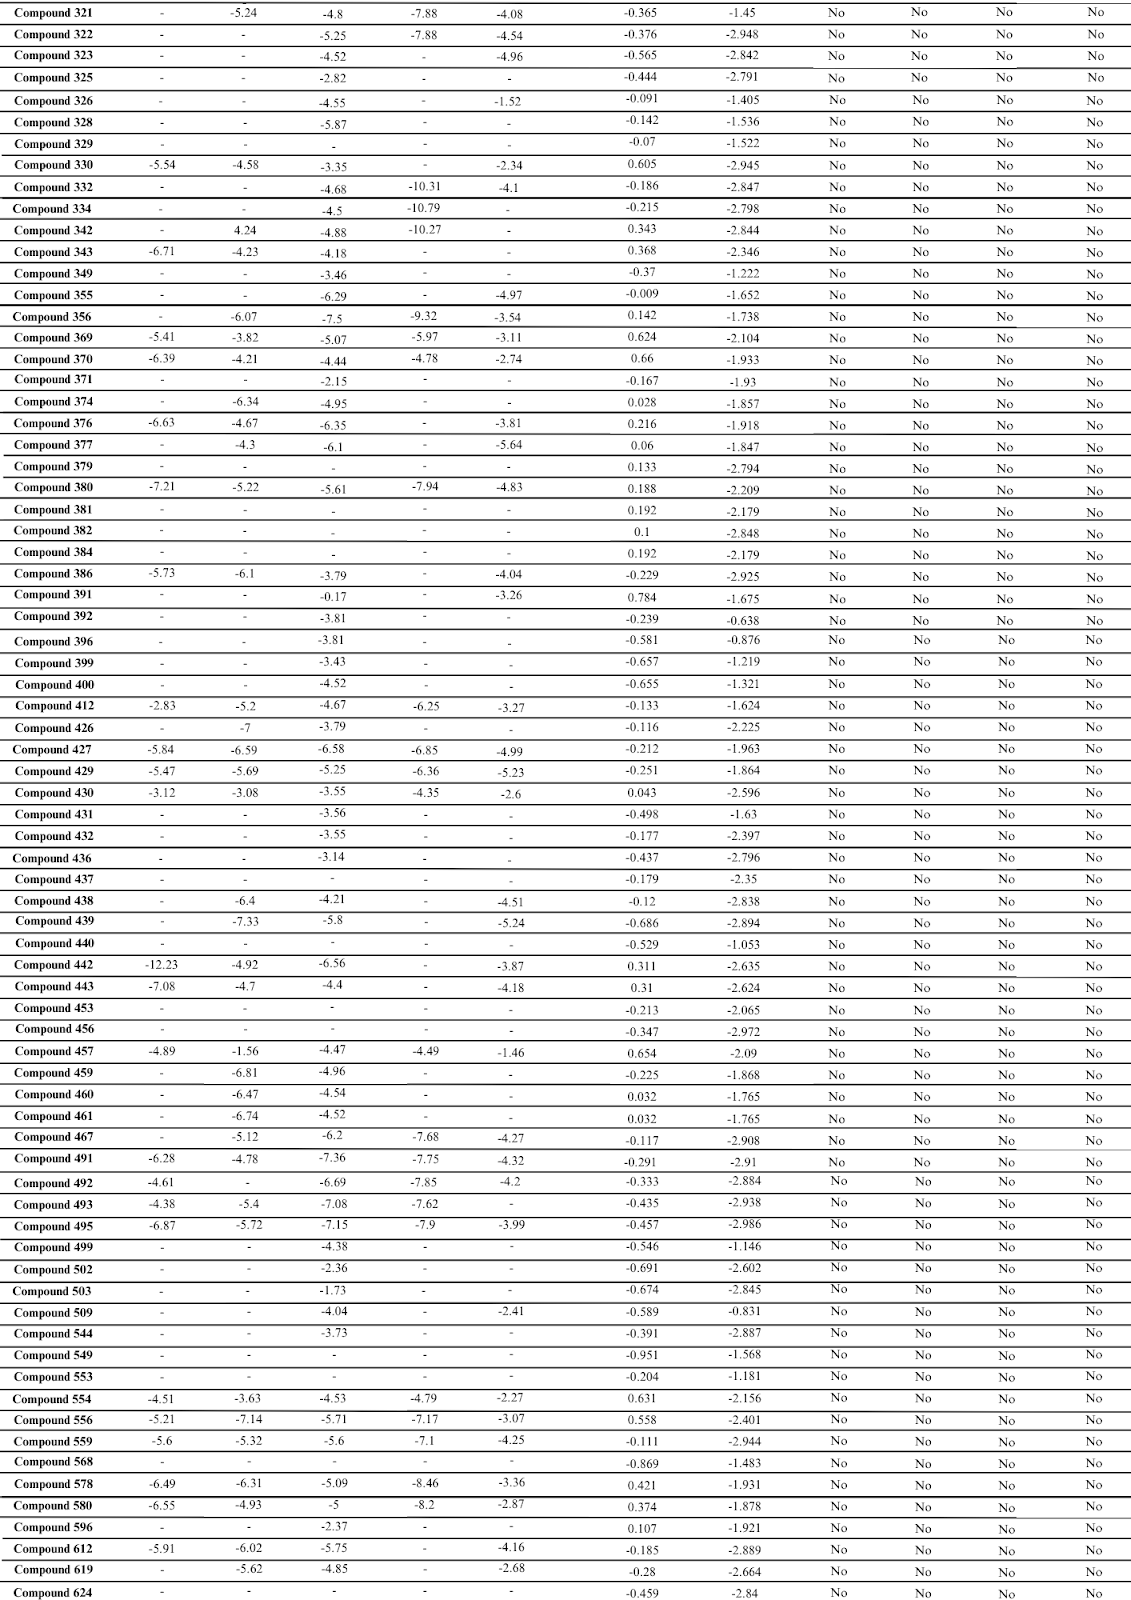


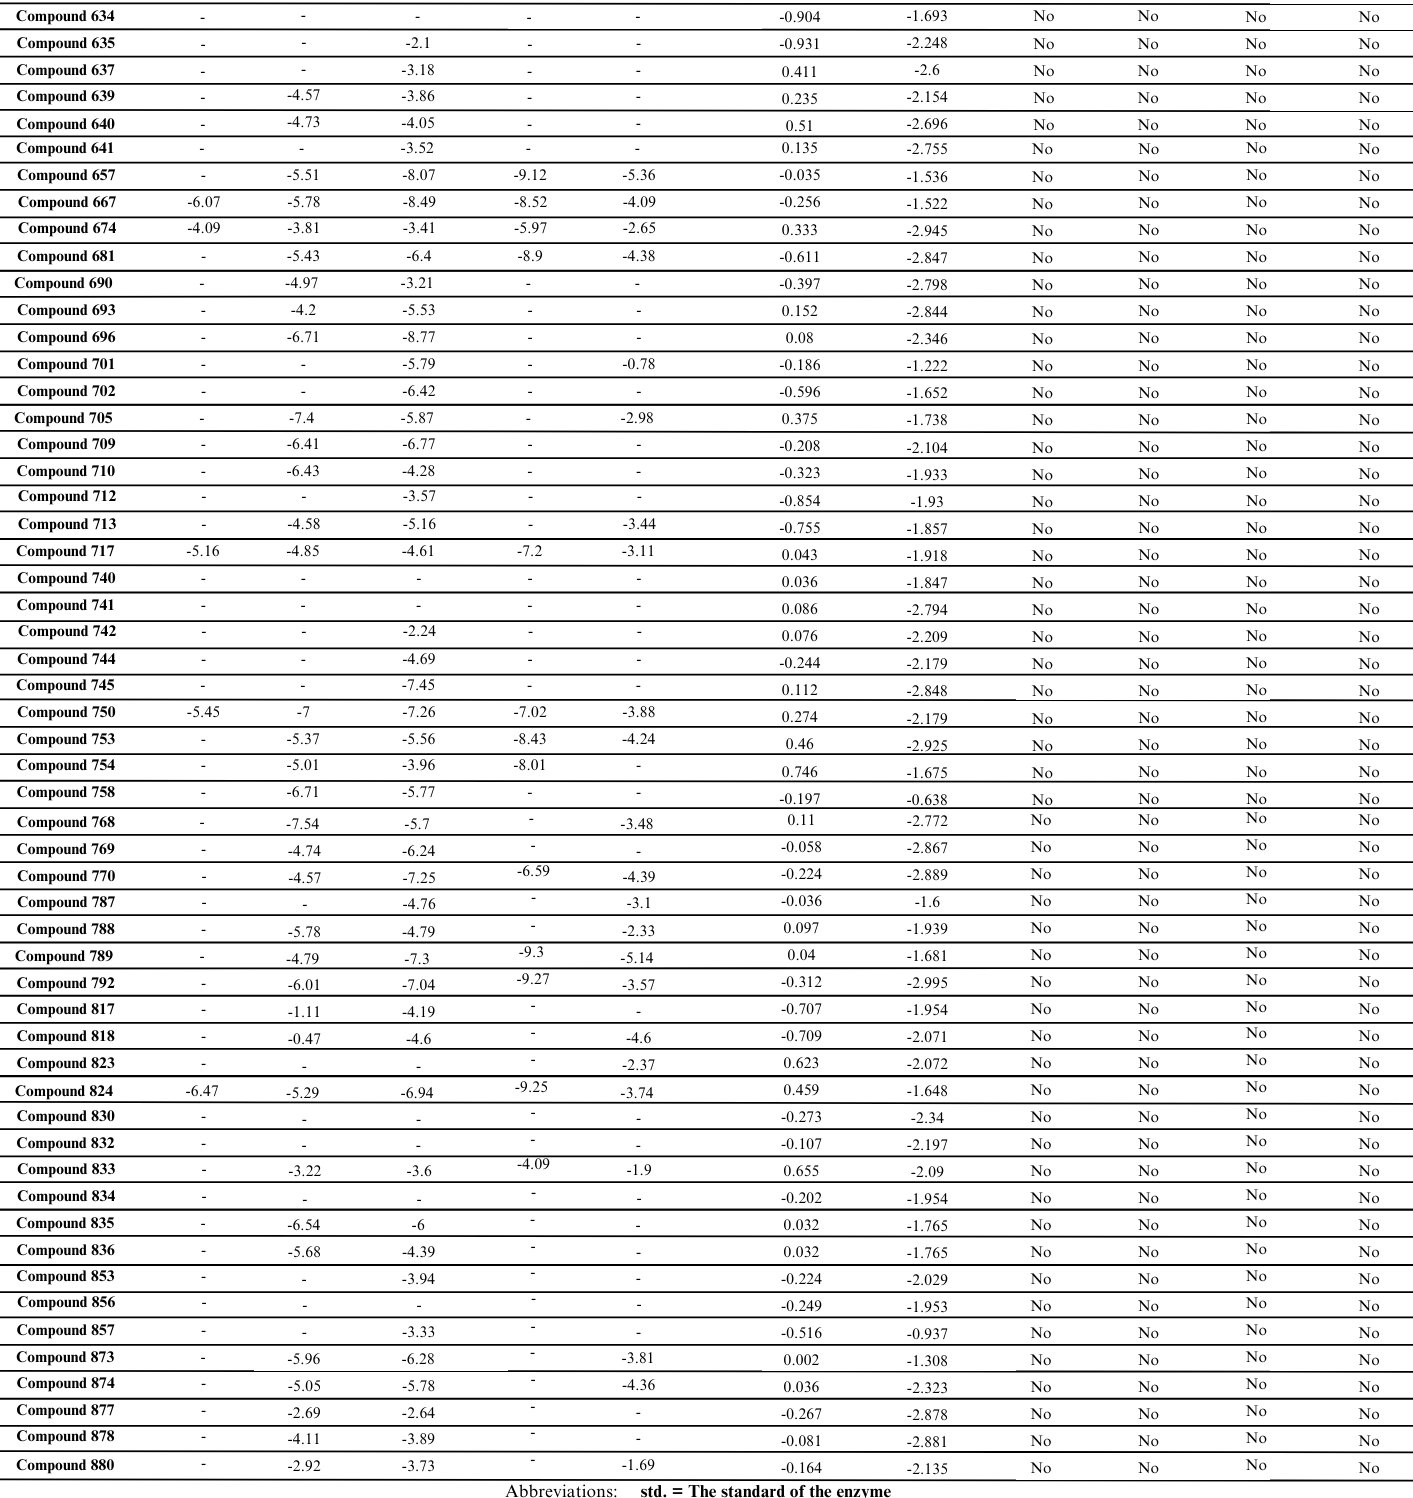

Supplement: Supplementary file 1 [file Table s1.docx]
