# Supplementary material for: African Natural Products for Multitarget-Based Treatment of Alzheimer’s Disease: An In Silico Study
Source: Preprints.org preprint supplement (doi:10.20944/preprints202310.0783.v1), 2023-10-12

Supplementary table 2

Table S2: MM-GBSA scores of the top 5 compounds for each enzyme and the 32 ones of BuChE


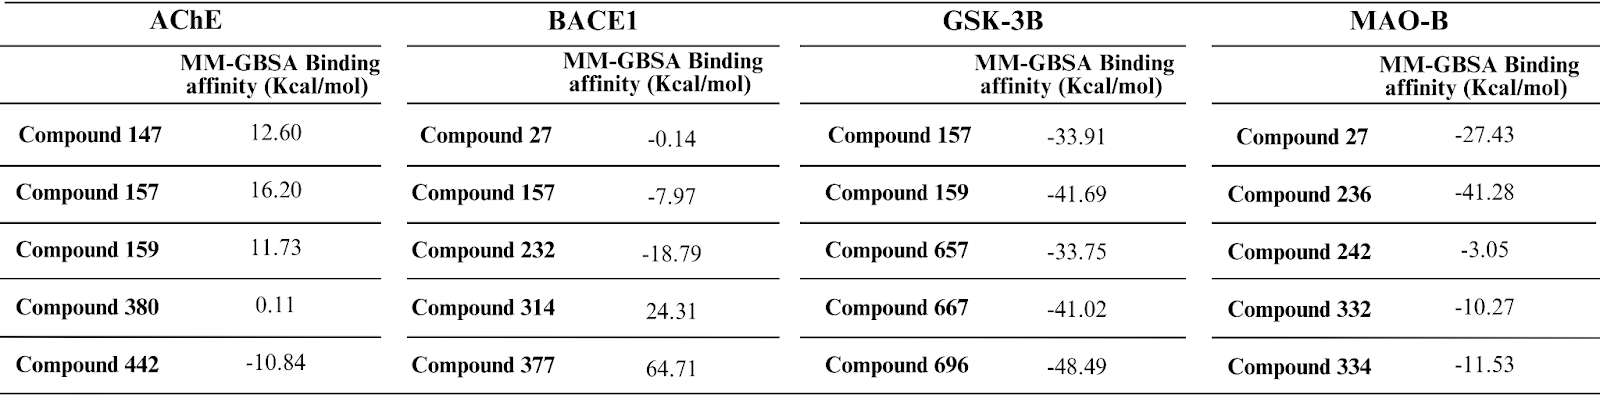


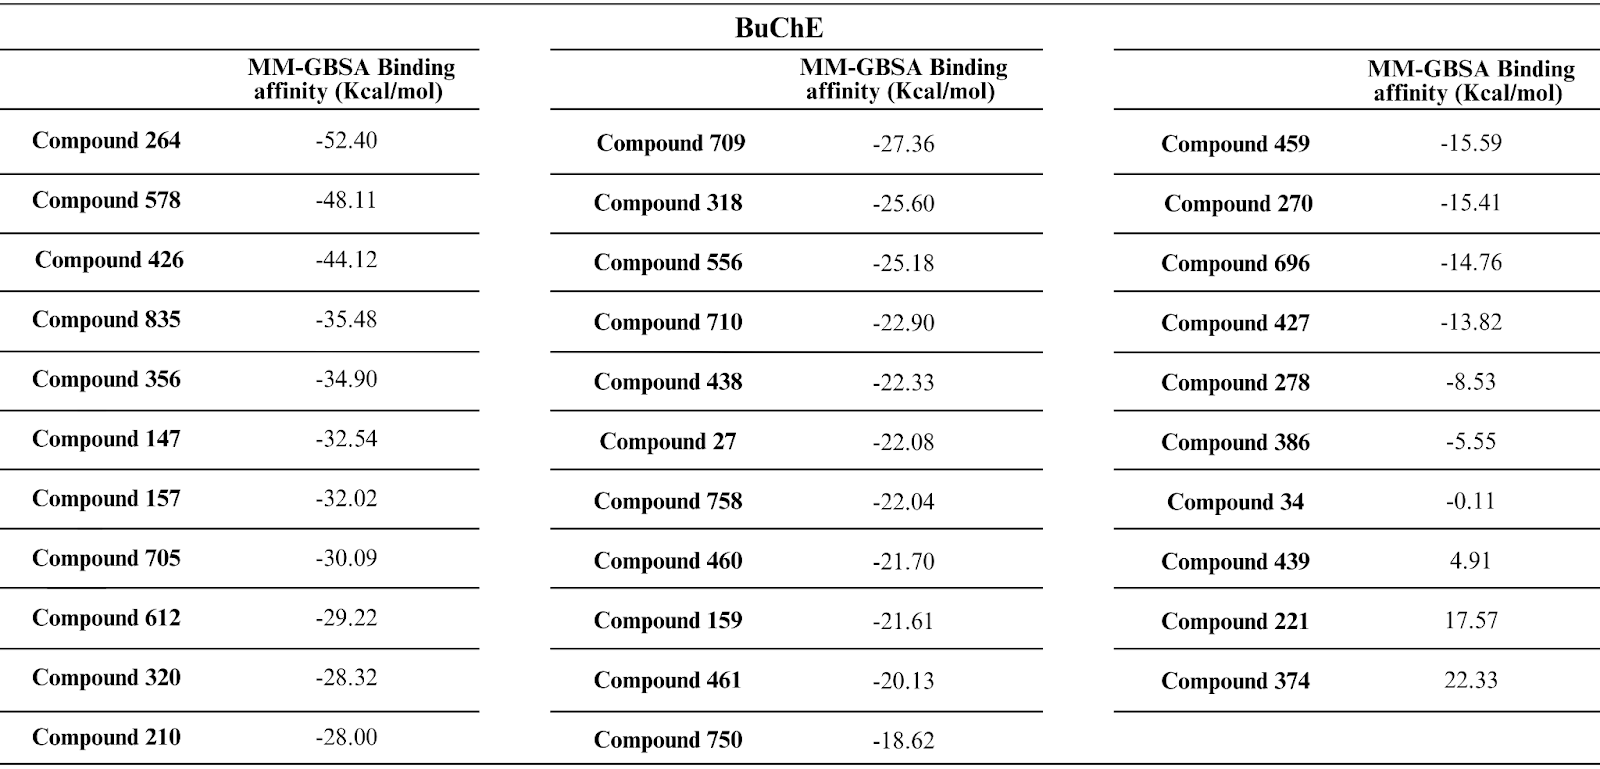

Supplement: Supplementary file 2 [file Table s2.docx]
